# Supplementary material for: In Utero Cell Treatment of Hemophilia A Mice via Human Amniotic Fluid Mesenchymal Stromal Cell Engraftment
Source: MDPI journal article supplement (doi:10.3390/ijms242216411), 2023-11-16
Supplement: s1 [file s1]

**Supplementary Table S1.** Preparation of hAFMSCs trilineage differentiation media

| <b>Reagent</b>                             | <b>Working concentration</b> |
|--------------------------------------------|------------------------------|
| <u>Adipogenic differentiation medium</u>   |                              |
| Dexamethasone                              | 1 $\mu$ M                    |
| Insulin                                    | 10 $\mu$ g/ml                |
| Isobutylmethylxanthine (IBMX)              | 0.5 mM                       |
| Indomethacin                               | 10 $\mu$ M                   |
| Fetal bovine serum (FBS)                   | 10%                          |
| Penicillin/Streptomycin (P/S)              | 1%                           |
| <u>Osteogenic differentiation medium</u>   |                              |
| Dexamethasone                              | 0.1 $\mu$ M                  |
| L-ascorbic acid 2-phosphate                | 0.2 mM                       |
| $\beta$ -glycerophosphate                  | 10 mM                        |
| Fetal bovine serum (FBS)                   | 10%                          |
| Penicillin/Streptomycin (P/S)              | 1%                           |
| <u>Chondrogenic differentiation medium</u> |                              |
| Dexamethasone                              | 0.1 $\mu$ M                  |
| Insulin                                    | 10 $\mu$ g/ml                |
| Transferrin                                | 5.5 $\mu$ g/ml               |
| Sodium selenite                            | 7 ng/ml                      |
| L-ascorbic acid 2-phosphate                | 0.2 mM                       |
| Transforming growth factor- $\beta$ 1      | 10 ng/ml                     |
| Fetal bovine serum (FBS)                   | 10%                          |
| Penicillin/Streptomycin (P/S)              | 1%                           |

**Supplementary Table S2.** The information of Taqman probe and primer sequences for PCR and ddPCR used in this study

| Gene name      | Sequence (5' to 3')                                                                                 | 5' Fluorescent reporter | 3' Quencher | Tm (°C) | Amplicon size (bp) |
|----------------|-----------------------------------------------------------------------------------------------------|-------------------------|-------------|---------|--------------------|
| <i>HBB</i>     | F: 5'- CTGTGTTCACTAGCAACCTC-3'<br>R: 5'- CTGTCTTGTAACCTTGATACCAA-3'<br>P: 5'- ATCCACGTTACACCTTG-3'  | VIC                     | MGB         | 60      | 79                 |
| <i>TFAP2A</i>  | F: 5'- CAATGGGTTTCAGCTGCTTATTG-3'<br>R: 5'- CCCAGGCGTATTTTTGTTCT-3'<br>P: 5'- AATTGCCAAGGGA-3'      | FAM                     | MGB         | 60      | 111                |
| <i>FVIII</i>   | F: 5'- ACCAGCATGTATGTGAAGGAGTTC-3'<br>R: 5'- CCACAGGTGTGAAGGAGTCTTG-3'<br>P: 5'- AGCAGTCAAGATGGC-3' | FAM                     | MGB         | 60      | 124                |
| <i>β-actin</i> | F: 5'- ACCAGCATGTATGTGAAGGAGTTC-3'<br>R: 5'- CCACAGGTGTGAAGGAGTCTTG-3'                              |                         |             | 60      | 143                |

**Supplementary Table S3.** The information of specify analyses were performed on each mouse in this study

| Recipient mice number | Analyses                                                                      |
|-----------------------|-------------------------------------------------------------------------------|
| No.1                  | aPTT, FVIII activity test, FVIII inhibitor test, ddPCR test                   |
| No.2                  | aPTT, FVIII activity test, FVIII inhibitor test, ddPCR test                   |
| No.3                  | aPTT, FVIII activity test, FVIII inhibitor test                               |
| No.4                  | aPTT, FVIII activity test, FVIII inhibitor test                               |
| No.5                  | aPTT, FVIII activity test, FVIII inhibitor test                               |
| No.6                  | aPTT, FVIII activity test, FVIII inhibitor test                               |
| No.7                  | aPTT, FVIII activity test, FVIII inhibitor test, ddPCR test, Cell fusion test |
| No.8                  | aPTT, FVIII activity test, FVIII inhibitor test, ddPCR test, Cell fusion test |
| No.9                  | aPTT, FVIII activity test, FVIII inhibitor test, ddPCR test, Cell fusion test |

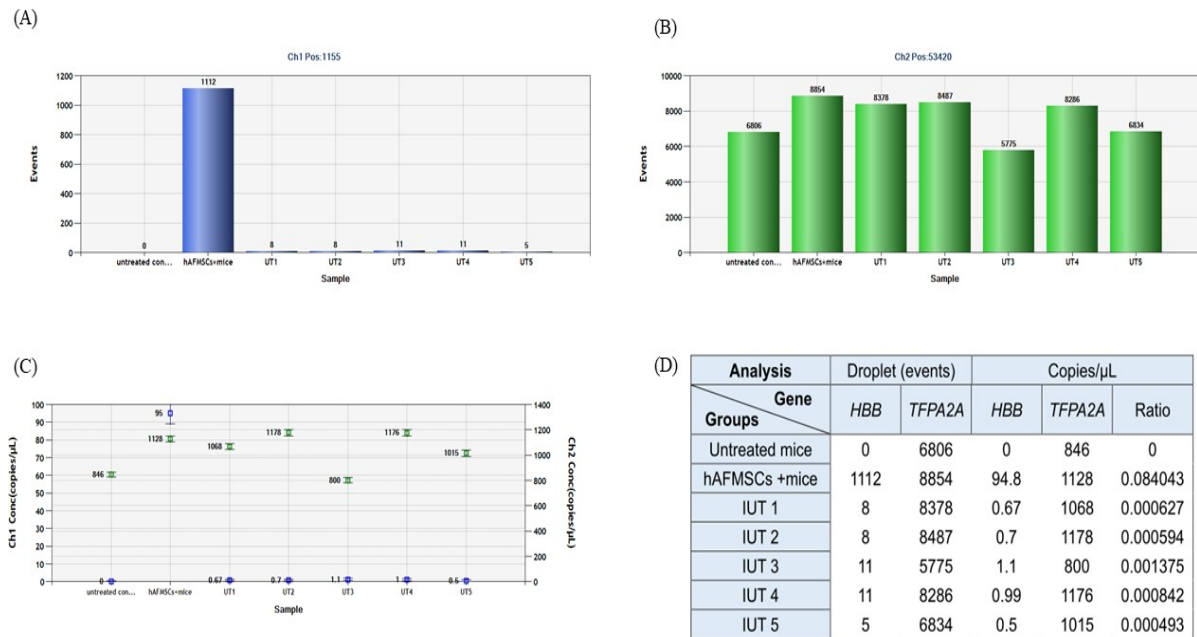

**Supplementary Figure S1.** The droplet events and copy numbers of *HBB* and *TFPA2A* gene amplicons detected by the ddPCR. **(A)** The *HBB* gene droplet events. **(B)** The *TFPA2A* gene droplet events. **(C)** The copy numbers of *HBB* (blue spots) and *TFPA2A* (green spots) calculated by Poisson distribution formula. **(D)** The *HBB* and *TFPA2A* droplet events and copy number ratios.
